# Supplementary material for: Synchronizing the Greenland ice core and radiocarbon timescales over the Holocene – Bayesian wiggle-matching of cosmogenic radionuclide records
Source: Copernicus journal article supplement (doi:10.5194/cp-12-15-2016), 2016-01-15
Supplement: Supplementary file 1 [file cp-12-15-2016-supplement.zip]

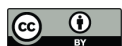

## *Supplement of*

# **Synchronizing the Greenland ice core and radiocarbon timescales over the Holocene – Bayesian wiggle-matching of cosmogenic radionuclide records**

**F. Adolphi and R. Muscheler**

*Correspondence to:* F. Adolphi ([florian.adolphi@geol.lu.se](mailto:florian.adolphi@geol.lu.se))

- [cp-12-15-2016-supplement-title-page.pdf](#)
- [Adolphi\\_Muscheler\\_2015\\_CPD\\_supplementary\\_material.xlsx](#)

The copyright of individual parts of the supplement might differ from the CC-BY 3.0 licence.
